# Supplementary material for: Targeting CD74 in multiple myeloma with the novel, site-specific antibody-drug conjugate STRO-001
Source: PubMed Central journal article supplement (PMC6340874; doi:10.18632/oncotarget.26491), 2018-12-28
Supplement: oncotarget-09-37700-s001.pdf [file oncotarget-09-37700-s001.pdf]

## **Targeting CD74 in multiple myeloma with the novel, site-specific antibody-drug conjugate STRO-001**

### **SUPPLEMENTARY MATERIALS**

**Supplementary Appendix 1: Targeting CD74 in multiple myeloma with the novel, site-specific antibody-drug conjugate STRO-001.**  
See Supplementary\_Appendix
